# Supplementary material for: The Nod2 Agonist Muramyl Dipeptide Cooperates with the TLR4 Agonist Lipopolysaccharide to Enhance IgG2b Production in Mouse B Cells
Source: Hindawi journal article supplement (doi:10.1155/2019/2724078), 2019-11-26
Supplement: f1 [file 2724078.f1.pdf]

## Supplementary Materials

SUPPLEMENTARY TABLE 1: RT-PCR primers

| Primer<br>(product size)    | Sequence                                                                          |
|-----------------------------|-----------------------------------------------------------------------------------|
| TLR4<br>(249 bp)            | Forward: 5'-CTGGGTGAGAAATGAGCTGG-3'<br>Reverse: 5'-CTGGGTGAGAAATGAGCTGG-3'        |
| Nod1<br>(547 bp)            | Forward: 5'-AGCTGCAGCCTTGCTTTAGCC-3'<br>Reverse: 5'-TCAGCCATAAATGCCGTAGCG-3'      |
| Nod2<br>(476 bp)            | Forward: 5'-CCGAAGCCCTAGCACTGATGC-3'<br>Reverse: 5'-CAACCATCACGACTCCTCGGG-3'      |
| GLT $\gamma$ 2b<br>(318 bp) | Forward: 5'-GGGAGAGCACTGGGCCTT-3'<br>Reverse: 5'-AGTCACTGACTCAGGGAA-3'            |
| GLT $\gamma$ 3<br>(349 bp)  | Forward: 5'-CAAGTGGATCTGAACACA-3'<br>Reverse: 5'-GGCTCCATAGTTCCATT-3'             |
| GLT $\gamma$ 1<br>(532 bp)  | Forward: 5'-CAGCCTGGTGTCAACTAG-3'<br>Reverse: 5'-CTGTACATATGCAAGGCT-3'            |
| AID<br>(405 bp)             | Forward: 5'-CCTCCTGCTCACTGGACTTC-3'<br>Reverse: 5'-GTCTGGTTAGCCGGACAGAA-3'        |
| $\beta$ -actin<br>(318 bp)  | Forward: 5'-CATGTTTGAGACCTTCAACACCCC-3'<br>Reverse: 5'-GCCATCTCCTGCTCGAAGTCTAG-3' |

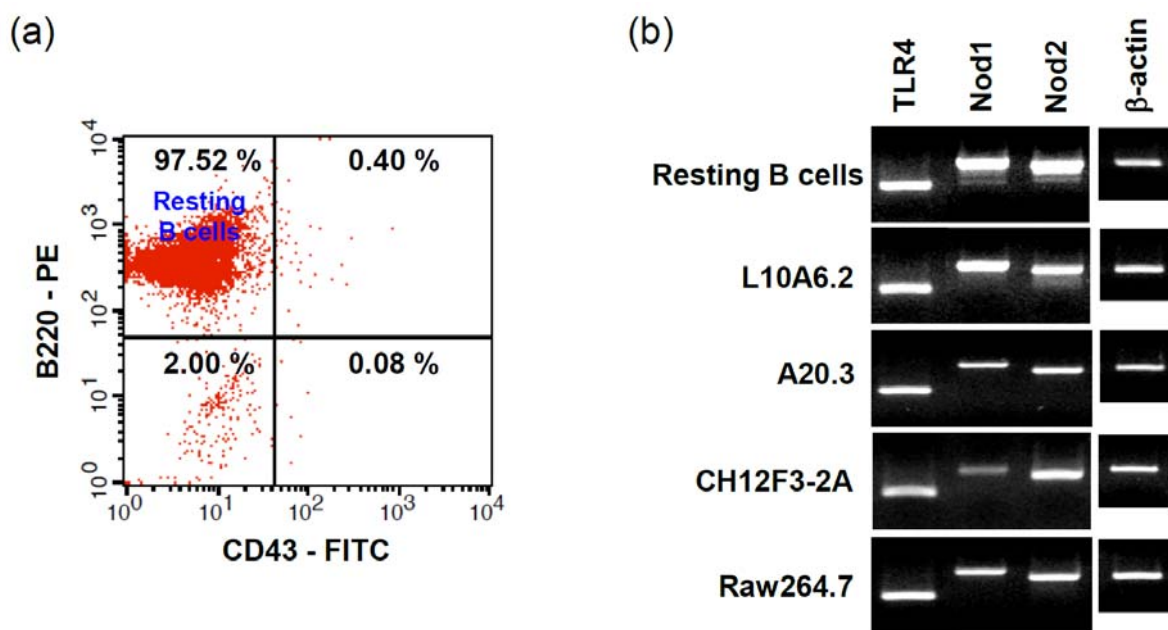

SUPPLEMENTARY FIGURE 1: Purity of resting B cells and expression of TLR4, Nod1, and Nod2 in the resting B cells. (a) Purity of isolated mouse spleen resting B cells ( $CD43^- B220^+$ ) was measured using flow cytometric analysis. (b) Total RNA was isolated from the resting B cells and the indicated cell lines. The levels of TLR4, Nod1, and Nod2 mRNA were measured by RT-PCR.
